# Supplementary material for: Additional Archaeological Investigations for the Proposed Lost Grove Lake Project, Including Phase II Investigations at Site 13st155, Scott County, Iowa.
Source: MDPI journal article supplement (doi:10.3390/ph16071053), 2001-01-01
Supplement: s1 [file s1]

# **Supplementary information**

## **Anti-Obesity Effect of Chlorin e6-Mediated Photodynamic Therapy in High Fat Diet-Induced Obese Mice**

**Rajeev Shrestha<sup>1</sup>, Pallavi Gurung<sup>1</sup>, Junmo Lim<sup>1</sup>, Til Bahadur Thapa Magar<sup>1</sup>, Cheong-Wun Kim<sup>1</sup>,  
Hak-Yong Lee<sup>2</sup>, and Yong-Wan Kim<sup>1,\*</sup>**

<sup>1</sup>Dongsung Cancer Center, Dongsung Biopharmaceutical, Daegu 41061, Republic of Korea

<sup>2</sup>INVIVO Co., Ltd., Nonsan 32992, Republic of Korea

\*Correspondence: thomas06@hanmail.net

### **TABLE OF CONTENTS**

**S1. Food and water intake of mouse model set 2**

**S2. Effects of Ce6-PDT on serum levels of liver and kidney toxicity markers mouse model**

**S3. Liver tissue slide scoring criteria**

**S4. Summary of main features of Model 1 and Model 2**

## S1. Food and water intake of mouse model set 2

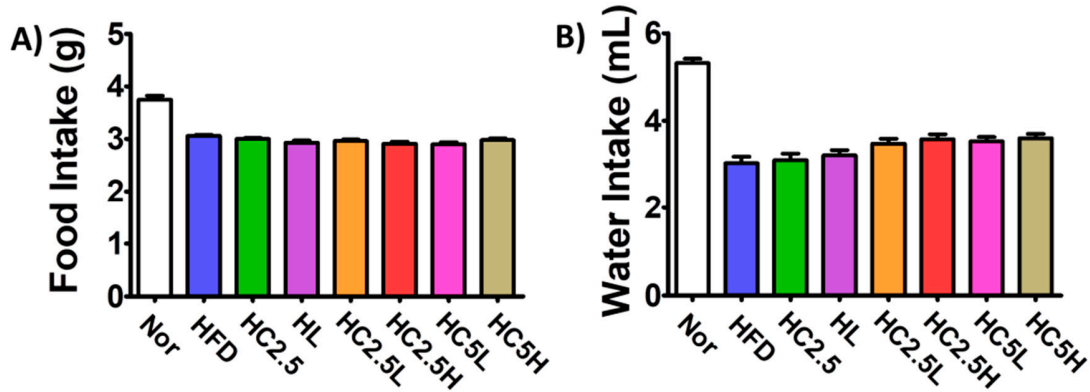

**Figure S1: (A) Food and (B) water intake of mouse model set 2.** Food and water were freely consumed in each test group. The consumed amount of food and water were measured by initial amount.

## S2. Effect of Ce6-PDT in liver and kidney toxicity markers (AST/ALT, BUN, Creatinine)

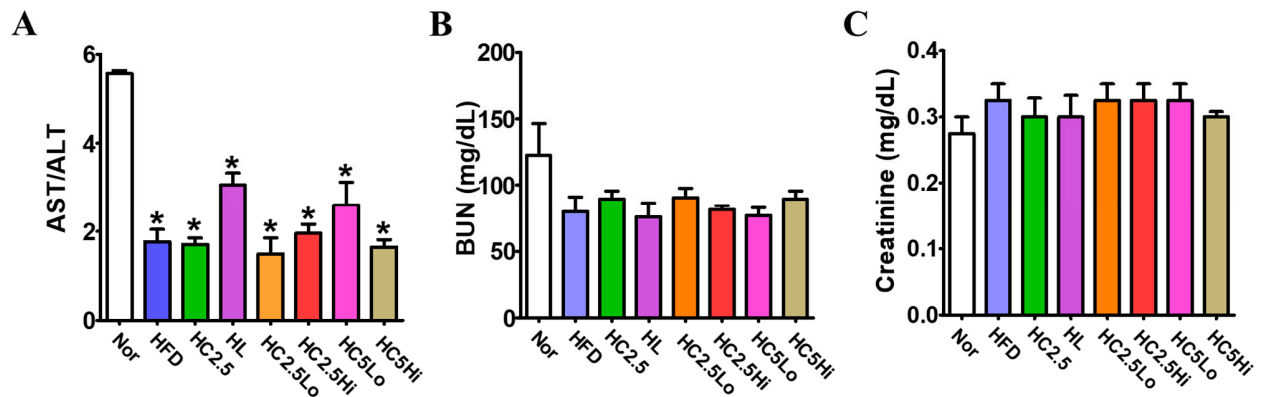

**Figure S2: Effects of Ce6-PDT on serum levels of liver and kidney toxicity markers of mouse model 2.** A) AST/ALT ratio, B) BUN, and C) Creatinine of the experimental mice groups. Data are expressed as mean  $\pm$  SD, (n = 3), \*p < 0.05, compared with the control group. #p < 0.05, compared with the HFD only-treated group.

### S3. Liver tissue slide scoring criteria

**Table S1:** Liver tissue slide scoring criteria

| Histological criteria      | Description             | Score |
|----------------------------|-------------------------|-------|
| Steatosis                  | < 5%                    | 0     |
|                            | 5~30%                   | 1     |
|                            | > 33~66%                | 2     |
|                            | > 66%                   | 3     |
| Lobular Inflammation       | No foci                 | 0     |
|                            | < 2 foci per 200× field | 1     |
|                            | 2~4 foci per 200× field | 2     |
|                            | > 4 foci per 200× field | 3     |
| Hepatocellular Hypertrophy | < 5%                    | 0     |
|                            | 5~30%                   | 1     |
|                            | > 33~66%                | 2     |
|                            | > 66%                   | 3     |

#### S4. Summary of main features of Model 1 and Model 2

**Table S2:** Major features of Model 1 and Model 2

| S.N. | Features                                                            | Model 1                                                                  | Model 2                                                                   |
|------|---------------------------------------------------------------------|--------------------------------------------------------------------------|---------------------------------------------------------------------------|
| 1    | Purpose                                                             | Preliminary experiment                                                   | Main experiment                                                           |
| 2    | Experimental Site                                                   | Conventional animal facility                                             | CRO for animal experiment                                                 |
| 3    | Groups                                                              | Normal, Vehicle-treated HFD, HC2.5Hi, HC5Lo and HC5H                     | Normal, Vehicle-treated HFD, HC2.5, HL, HC2.5Lo, HC2.5Hi, HC5Lo and HC5Hi |
| 4    | No of mice in each group                                            | 4                                                                        | 8                                                                         |
| 5    | Age of mice                                                         | 4 weeks                                                                  | 4 weeks                                                                   |
| 6    | Fat (%) in diet                                                     | 10% in NFD and 60% in HFD                                                | 10% in NFD and 60% in HFD                                                 |
| 7    | Length of HFD exposure                                              | 70 days                                                                  | 42 days                                                                   |
| 8    | % Increase in Fat                                                   | 70%                                                                      | 30%                                                                       |
| 9    | Doses of Ce6                                                        | 2.5 and 5 mg/kg                                                          | 2.5 and 5 mg/kg                                                           |
| 10   | Route of administration of Ce6                                      | Oral                                                                     | Oral                                                                      |
| 11   | Fluence of LED Light                                                | 2.56 mW/cm <sup>2</sup> for 5 min and 4.96 mW/cm <sup>2</sup> for 10 min | 2.56 mW/cm <sup>2</sup> for 5 min and 4.96 mW/cm <sup>2</sup> for 10 min  |
| 12   | Days of PDT treatment                                               | Every 2 days up to 29 days                                               | Every 2 days up to 29 days                                                |
| 13   | (%) Effectiveness of HC2.5Hi and HC5Hi groups compared to HFD group | 10%                                                                      | 14%                                                                       |
